# Supplementary material for: Multiplexed mRNA assembly into ribonucleoprotein particles plays an operon-like role in the control of yeast cell physiology
Source: eLife. 2021 May 4;10:e66050. doi: 10.7554/eLife.66050 (PMC8137142; doi:10.7554/eLife.66050)
Supplement: Supplementary file 2. — In this table, we include the strain name, genotype, and source of origin. [file elife-66050-supp2.docx]

**Supplementary File 2. Yeast strains used in this study**

| **Name** | **Genotype** | **Source** |
| --- | --- | --- |
| BY4741 | *MAT*a *his3Δ1 leu2Δ0 met15Δ0 ura3Δ0* | Euroscarf |
| BY4742 | *MAT*α *his3Δ1 leu2Δ0 lys2Δ0 ura3Δ0* | Euroscarf |
| *ABP1INT*  (BY4742) | *MAT*α *his3Δ1 leu2Δ0 lys2Δ0 ura3Δ0 ABP1::loxP::MS2L::ABP13’-UTR* | J. Gerst |
| *ASH1INT*  (BY4742) | *MAT*α *his3Δ1 leu2Δ0 lys2Δ0 ura3Δ0 ASH1::loxP::MS2L::ASH13’-UTR* | J. Gerst |
| *ATG8INT*  (BY4742) | *MAT*α *his3Δ1 leu2Δ0 lys2Δ0 ura3Δ0 ATG8::loxP::MS2L::ATG83’-UTR* | J. Gerst |
| *EXO70INT*  (BY4742) | *MAT*α *his3Δ1 leu2Δ0 lys2Δ0 ura3Δ0 EXO70::loxP::MS2L::EXO703’-UTR* | J. Gerst |
| *MFα1INT*  (BY4742) | *MAT*α *his3Δ1 leu2Δ0 lys2Δ0 ura3Δ0 MFα1::loxP::MS2L::MFα1 3’-UTR* | This study |
| *MFα2INT*  (BY4742) | *MAT*α *his3Δ1 leu2Δ0 lys2Δ0 ura3Δ0 MFα2::loxP::MS2L::MFα23’-UTR* | This study |
| *MYO2INT*  (BY4742) | *MAT*α *his3Δ1 leu2Δ0 lys2Δ0 ura3Δ0 MYO2::loxP::MS2L::MYO23’-UTR* | J. Gerst |
| *MYO4INT*  (BY4742) | *MAT*α *his3Δ1 leu2Δ0 lys2Δ0 ura3Δ0 MYO4::loxP::MS2L::MYO43’-UTR* | J. Gerst |
| *OM45INT*  (BY4742) | *MAT*α *his3Δ1 leu2Δ0 lys2Δ0 ura3Δ0 OM45::loxP::MS2L::OM453’-UTR* | J. Gerst |
| *OXA1INT*  (BY4742) | *MAT*α *his3Δ1 leu2Δ0 lys2Δ0 ura3Δ0 OXA1::loxP::MS2L::OXA13’-UTR* | J. Gerst |
| *PEX14INT*  (BY4742) | *MAT*α *his3Δ1 leu2Δ0 lys2Δ0 ura3Δ0 PEX14::loxP::MS2L::PEX143’-UTR* | J. Gerst |
| *SAG1INT*  (BY4742) | *MAT*α *his3Δ1 leu2Δ0 lys2Δ0 ura3Δ0 SAG1::loxP::MS2L::SAG13’-UTR* | This study |
| *SEC4INT*  (BY4742) | *MAT*α *his3Δ1 leu2Δ0 lys2Δ0 ura3Δ0 SEC4::loxP::MS2L::SEC43’-UTR* | J. Gerst |
| *SRO7INT*  (BY4742) | *MAT*α *his3Δ1 leu2Δ0 lys2Δ0 ura3Δ0 SRO7::loxP::MS2L::SRO73’-UTR* | J. Gerst |
| *STE3INT*  (BY4742) | *MAT*α *his3Δ1 leu2Δ0 lys2Δ0 ura3Δ0 STE3::loxP::MS2L::STE33’-UTR* | This study |
| *AGA1INT*  (BY4741) | *MAT*a *his3Δ1 leu2Δ0 met15Δ0 ura3Δ0 AGA1::loxP::MS2L::AGA13’-UTR* | This study |
| *AGA2INT*  (BY4741) | *MAT*a *his3Δ1 leu2Δ0 met15Δ0 ura3Δ0 AGA2::loxP::MS2L::AGA23’-UTR* | This study |
| *ASH1INT*  (BY4741) | *MAT*a *his3Δ1 leu2Δ0 met15Δ0 ura3Δ0 ASH1::loxP::MS2L::ASH13’-UTR* | J. Gerst |
| *MFA1INT*  (BY4741) | *MAT*a *his3Δ1 leu2Δ0 met15Δ0 ura3Δ0 MFA1::loxP::MS2L::MFA13’-UTR* | This study |
| *MFA2INT*  (BY4741) | *MAT*a *his3Δ1 leu2Δ0 met15Δ0 ura3Δ0 MFA2::loxP::MS2L::MFA23’-UTR* | This study |
| *MFA1INT 3’UTRΔ*  (BY4741) | *MAT*a *his3Δ1 leu2Δ0 met15Δ0 ura3Δ0 MFA1::loxP::MS2L::MFA13’-UTRΔ::HIS3* | This study |
| *MFA2INT 3’UTRΔ*  (BY4741) | *MAT*a *his3Δ1 leu2Δ0 met15Δ0 ura3Δ0 MFA2::loxP::MS2L::MFA23’-UTRΔ::HIS3* | This study |
| *STE2INT*  (BY4741) | *MAT*a *his3Δ1 leu2Δ0 met15Δ0 ura3Δ0 STE2::loxP::MS2L:: STE23’-UTR* | This study |
| *STE2INT AGA2INT*  (BY4741) | *MAT*a *his3Δ1 leu2Δ0 met15Δ0 ura3Δ0 STE2::loxP::MS2L:: STE23’-UTR AGA2::loxP::PP7L:: AGA23’-UTR* | This study |
| *STE2INT 3’UTRΔ*  (BY4741) | *MAT*a *his3Δ1 leu2Δ0 met15Δ0 ura3Δ0 STE2::loxP::MS2L::STE23’-UTRΔ::HIS3* | This study |
| *STE2INT 3’UTR*  *DHH1-m*Cherry  (BY4741) | *MAT*a *his3Δ1 leu2Δ0 met15Δ0 ura3Δ0 DHH1::mCherry::natMx STE2::loxP::MS2L::STE23’-UTR* | This study |
| *STE5INT bar1Δ*  (BY4741) | *MAT*a *his3Δ1 leu2Δ0 met15Δ0 ura3Δ0 STE5::loxP::MS2L::STE53’-UTR bar1Δ::natMx* | This study |
| *STE5INT FUS3INT* (BY4741) | *MAT*a *his3Δ1 leu2Δ0 met15Δ0 ura3Δ0 STE5::loxP::MS2L::STE53’-UTR FUS3::loxP::PP7L:: FUS33’-UTR*  *bar1Δ::natMx* | This study |
| *UGO1INT* (BY4741) | *MAT*a *his3Δ1 leu2Δ0 met15Δ0 ura3Δ0 UGO1::loxP::MS2L::UGO13’-UTR* | This study |
| *UGO1INT TOM6 INT* (BY4741) | *MAT*a *his3Δ1 leu2Δ0 met15Δ0 ura3Δ0 UGO1::loxP::MS2L::UGO13’-UTR TOM6::loxP::PP7L::TOM63’-UTR* | This study |
| *bar1Δ*  (BY4741) | *MAT*a *his3Δ1 leu2Δ0 met15Δ0 ura3Δ0 bar1Δ:: hphMx* | This study |
| *dhh1Δ* (BY4741) | *MATa his3Δ1 leu2Δ0 met15Δ0 ura3Δ0 dhh1Δ::natMx* | This study |
| *dhh1Δ pat1Δ*  (BY4741) | *MATa his3Δ1 leu2Δ0 met15Δ0 ura3Δ0 dhh1Δ::natMx*  *pat1Δ::hphMx* | This study |
| *hat1Δ*  (BY4741) | *MATa his3Δ1 leu2Δ0 met15Δ0 ura3Δ0 sas2Δ::natMx* | This study |
| *hat2Δ*  (BY4741) | *MATa his3Δ1 leu2Δ0 met15Δ0 ura3Δ0 htb1Δ::natMx* | This study |
| *hhf1Δ*  (BY4741) | *MAT*a *his3Δ1 leu2Δ0 met15Δ0 ura3Δ0 hhf1Δ::natMx* | This study |
| *hhf2Δ*  (BY4741) | *MAT*a *his3Δ1 leu2Δ0 met15Δ0 ura3Δ0 hhf2Δ::natMx* | This study |
| *HA-AID-HHF1 hhf2Δ*  (BY4741) | *MAT*a *his3Δ1 leu2Δ0 met15Δ0 ura3Δ0 HHF1::HA-AID-hhf1*  *hhf2Δ:: prTIR1-TEF3* | This study |
| *hhf1K-R*  (BY4741) | *MATa his3Δ1 leu2Δ0 met15Δ0 ura3Δ0 hhf1K-R* | This study |
| *hhf1Δ*  *scp160Δ*  (BY4741) | *MATa his3Δ1 leu2Δ0 met15Δ0 ura3Δ0 hhf1Δ::natMx scp160Δ::hphMx* | This study |
| *hht1Δ*  (BY4741) | *MAT*a *his3Δ1 leu2Δ0 met15Δ0 ura3Δ0 hht1Δ::natMx* | This study |
| *hht2Δ*  (BY4741) | *MAT*a *his3Δ1 leu2Δ0 met15Δ0 ura3Δ0 hht2Δ::natMx* | This study |
| *hta1Δ*  (BY4741) | *MAT*a *his3Δ1 leu2Δ0 met15Δ0 ura3Δ0 hta1Δ::natMx* | This study |
| *hta2Δ*  (BY4741) | *MAT*a *his3Δ1 leu2Δ0 met15Δ0 ura3Δ0 hta2Δ::natMx* | This study |
| *htb1Δ*  (BY4741) | *MAT*a *his3Δ1 leu2Δ0 met15Δ0 ura3Δ0 htb1Δ::natMx* | This study |
| *htb2Δ*  (BY4741) | *MAT*a *his3Δ1 leu2Δ0 met15Δ0 ura3Δ0 htb2Δ::natMx* | This study |
| *pat1Δ* (BY4741) | *MATa his3Δ1 leu2Δ0 met15Δ0 ura3Δ0 pat1Δ::natMx* | This study |
| *sas2Δ*  (BY4741) | *MATa his3Δ1 leu2Δ0 met15Δ0 ura3Δ0 sas2Δ::natMx* | This study |
| *scp160Δ*  BY4742 | *MATα his3Δ1 leu2Δ0 lys2Δ0 ura3Δ0 scp160Δ::natMx* | This study |
| GFPlacI tetR-3xCFP  (W303) | *MATa leu2-3,112 trp1-1 can1-100 ura3-1 ade2-1*::*tetR*-*X3CFP*::*hphMx his3-11,15*::*GFPlacI::HIS3* | Dovrat *et al.* 2018 |
| GFPlacI tetR- tdtomato  (W303) | *MATa leu2-3,112 trp1-1 can1-100 ura3-1 ade2-1*::*tetR-td* *tomato*::*kanMx his3-11,15::GFPlacI::HIS3* | This study |
| GFPLacI tetR- tdtomato *AGA2* 224×tetR and *STE2* 256×lacO  (W303) | *MATa leu2-3,112 trp1-1 can1-100 ura3-1 ade2-1*::*tetR-tdtomato*::*kanMx his3-11,15*::*GFPlacI::HIS3 AGA2::224×tetR::LEU2::AGA23’-UTR*  *STE2::256×lacO::TRP1::STE2 3’-UTR* | This study |
| GFPlacI tetR- tdtomato *AGA2* 224×TetR and *ASH1* 256×lacO  (W303) | *MATa leu2-3,112 trp1-1 can1-100 ura3-1 ade2-1*::*tetR-td tomato::kanMx his3-11,15::GFPlacI::HIS3 AGA2::224×TetR LEU2::*AGA23’-UTR *ASH1*::*256×LacO TRP1::ASH1 3’-UTR* | This study |
| GFPLacI tetR- tdtomato *AGA2* 224×tetR and *STE2* 256×lacO *hhf1Δ*  (W303) | *MATa leu2-3,112 trp1-1 can1-100 ura3-1 ade2-1*::*tetR-tdtomato*::*kanMx his3-11,15*::*GFPlacI::HIS3 AGA2::224×tetR::LEU2::AGA23’-UTR*  *STE2::256×lacO::TRP1::STE2 3’-UTR* *hhf11Δ::natMx* | This study |
